# Supplementary material for: Gene therapy with a synthetic adeno-associated viral vector improves audiovestibular phenotypes in Pjvk-mutant mice
Source: PubMed Central journal article supplement (PMC9714786; doi:10.1172/jci.insight.152941), 2022-10-24
Supplement: jciinsight-7-152941-s233.pdf [file jciinsight-7-152941-s233.pdf]

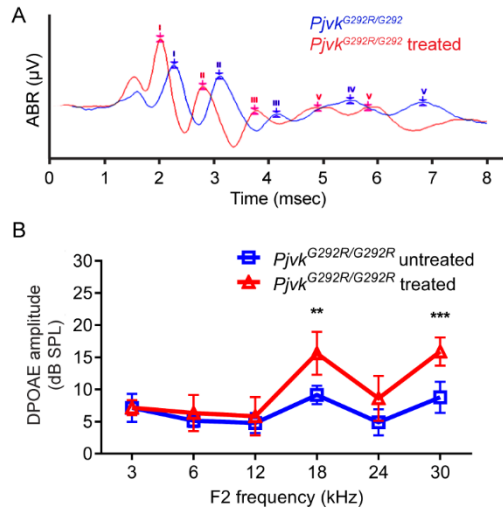

**Fig. S1. The ABR waveform and DPOAE levels of *Pjvk*<sup>G292R/G292R</sup> and treated**

***Pjvk*<sup>G292R/G292R</sup> mice.**

(A) Superimposed ABR traces (click stimuli) at 100 dB SPL. (B) The mean values of DPOAE

amplitude in P21 mice (untreated N=11, treated N=9). Data are shown as the mean  $\pm$  SD. \*\*,

$p < 0.01$ ; \*\*\*,  $p < 0.0001$ . Data are shown as the mean  $\pm$  SD. (\*\*\*)  $P = 0.0001$ , \*\*  $P < 0.005$ ,

Student's t test).

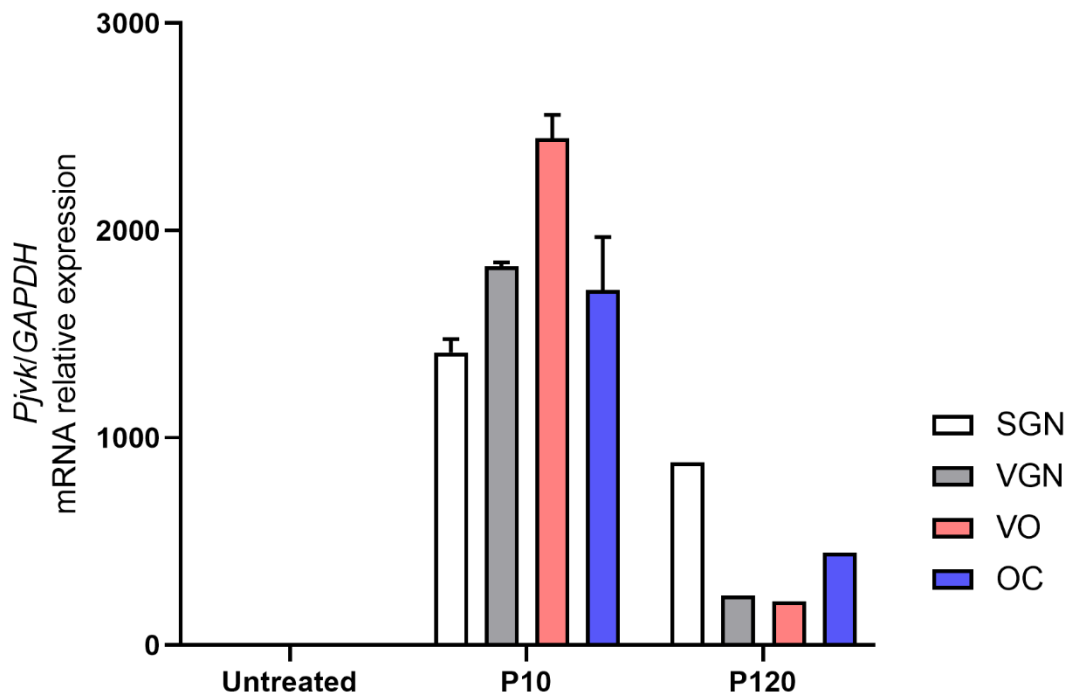

1

2 **Fig. S2. Long-term *PJVK* mRNA expression in the inner ear organs after Anc80L65-**

3 **CMV-PJVK neonatal injection.**

4 Quantification of human *PJVK* mRNA expression in untreated and treated *Pjvk*<sup>G292R/G292R</sup>

5 mice at different time points. P10 and P120 *Pjvk*<sup>G292R/G292R</sup> mice injected with Anc80L65-

6 CMV-PJVK at P0-1 were used to evaluate long-term PJVK expression. Samples were

7 divided into SGNs, VGNs, VO, and OC, and *PJVK* mRNA expression was detected by qPCR

8 (N=5 in the P10 group, N=1 in the P120 group). Data are shown as the mean ± SD. SGN:

9 spiral ganglion neuron, VGN: vestibular ganglion neuron, VHC: vestibular hair cells, CHC:

10 cochlear hair cells, VO: vestibular organs, OC: organ of Corti.

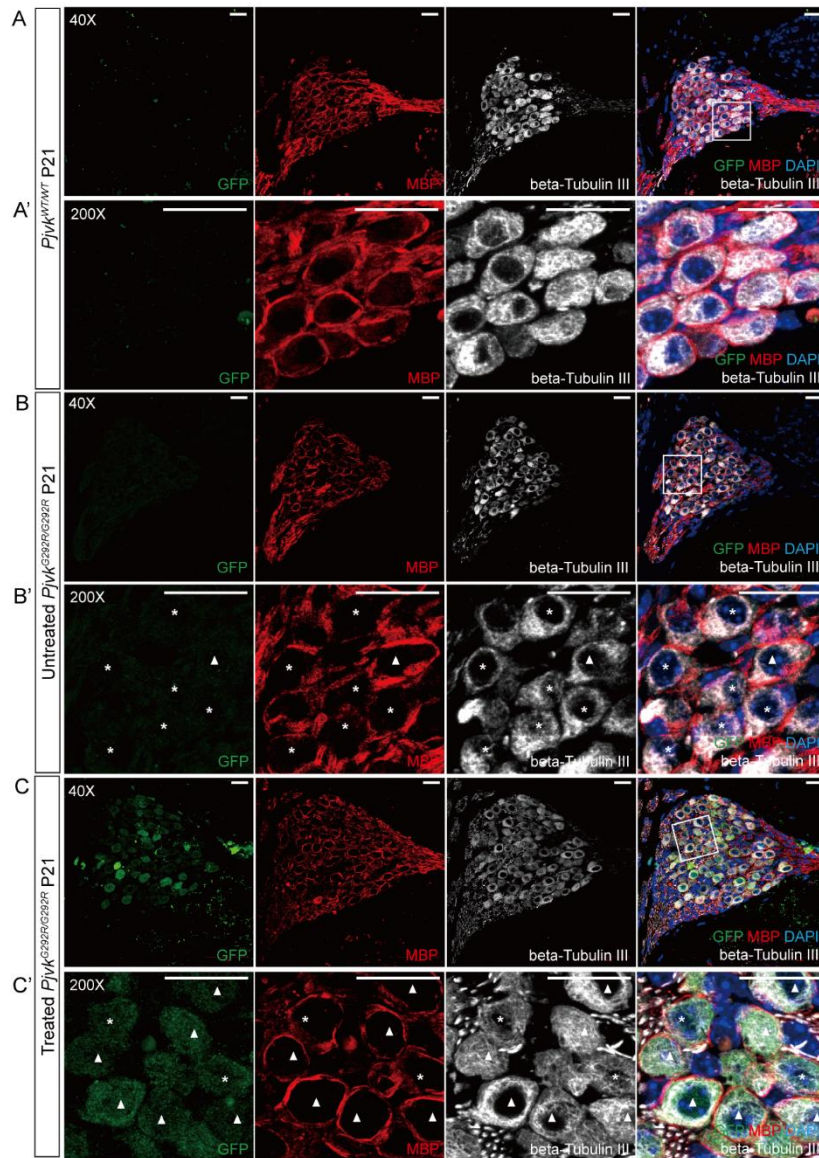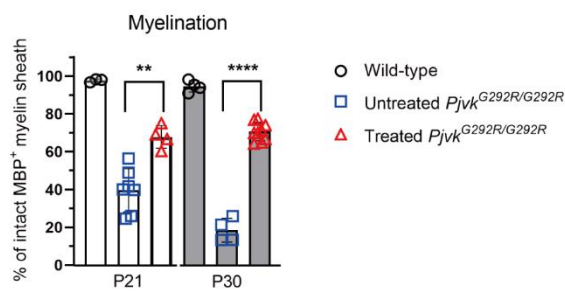

11

12 **Fig. S3. Anc80L65-CMV-PJVK rescues SGN demyelination in *Pjvk*<sup>G292R/G292R</sup> mice.**

13 Immunofluorescence staining of SGN paraffin sections taken at P21 from wild-type (A),

14 untreated (B), and treated (C) *Pjvk*<sup>G292R/G292R</sup> SGNs. The SGNs were stained with an anti-  
15 MBP antibody for the myelination marker and an anti-beta-III tubulin antibody for the  
16 neuronal marker. (A-A') Wild-type SGN is shown as a positive control. Most neurons are  
17 enveloped by intact MBP<sup>+</sup> myelin sheaths. (B-B') Untreated *Pjvk*<sup>G292R/G292R</sup> mice show  
18 relatively normal neuron morphology (beta-III tubulin<sup>+</sup>) but abnormal myelination (MBP<sup>+</sup>) in  
19 the SGN at P21. Asterisks indicate that the SGNs are partially or not enclosed by myelin  
20 sheaths. (C-C') After Anc80L65-CMV-PJVK injection, the MBP and GFP double-positive  
21 SGNs in *Pjvk*<sup>G292R/G292R</sup> mice are represented by arrows. (D) Quantification of the percentage  
22 of beta-III tubulin<sup>+</sup> SGNs with intact MBP<sup>+</sup> myelin sheaths in each group (P21, *Pjvk*<sup>WT/WT</sup>  
23 N=3, untreated *Pjvk*<sup>G292R/G292R</sup> N=7, and treated *Pjvk*<sup>G292R/G292R</sup> N=3; P30, *Pjvk*<sup>WT/WT</sup> N=4,  
24 untreated *Pjvk*<sup>G292R/G292R</sup> N=4, and treated *Pjvk*<sup>G292R/G292R</sup> N=9). The MBP<sup>+</sup> myelin sheath was  
25 considered intact if it enclosed more than 80% of the outline of the beta-III tubulin<sup>+</sup> cells.  
26 Scale bars = 20 μm in A-C and 20 μm in A'-C'. Data are shown as the mean ±SD. (\*\* *P*<0.01  
27 untreated vs. treated mice at P21, \*\*\*\*, *P*<0.0001 untreated vs. treated mice at P30, one-way  
28 ANOVA with Tukey post hoc tests).  
29

| Latencies (msec) |                                           |                                                  |                |
|------------------|-------------------------------------------|--------------------------------------------------|----------------|
| ABR peak         | <i>Pjvk</i> <sup>G292R/G292R</sup> (N=10) | Treated <i>Pjvk</i> <sup>G292R/G292R</sup> (N=6) | <i>P</i> value |
| I                | 2.24±0.05                                 | 2.04±0.03                                        | <0.0001        |
| III              | 4.18±0.11                                 | 3.79±0.05                                        | <0.0001        |
| V                | 6.60±0.17                                 | 5.89±0.10                                        | <0.0001        |
| I-III            | 1.95±0.12                                 | 1.75±0.05                                        | 0.0018         |
| III-V            | 2.41±0.14                                 | 2.10±0.05                                        | 0.0001         |
| I-V              | 4.36±0.18                                 | 3.85±0.09                                        | <0.0001        |

Statistical tests were Student's t test.

30

31 **Table S1. Absolute and interpeak latencies of ABR waves of *Pjvk*<sup>G292R/G292R</sup> and treated**

32 ***Pjvk*<sup>G292R/G292R</sup> mice.**
